# Supplementary material for: Structural and theoretical investigation of 2-iminoimidazolines ? carbene analogues of iminophosphoranes
Source: Royal Society of Chemistry journal article supplement (doi:10.1039/b615418b), 2007-01-01
Supplement: b615418b.pdf [file b615418b.pdf]

## **SUPPORTING INFORMATION**

# **Structural and Theoretical Investigation of 2-Iminoimidazolines – Carbene Analogues of Iminophosphanes**

Matthias Tamm\*, Dejan Petrovic, Sören Randoll,  
Stephan Beer, Thomas Bannenberg, Peter G. Jones,  
and Jörg Grunenberg

### **Contents:**

- 1. Electronic Structure Calculations**
- 2. NRT (Natural Resonance Theory) Analysis**

## 1. Electronic Structure Calculations

### Structure of the dimer of 3a (atom, x-, y-, z-positions in Å):

|   |           |           |           |
|---|-----------|-----------|-----------|
| N | -0.240765 | 0.408930  | -1.589992 |
| N | -0.511025 | -0.058127 | -3.900442 |
| N | 1.591686  | -0.023805 | -3.170938 |
| C | 0.262410  | 0.137039  | -2.751910 |
| C | 0.331191  | -0.324492 | -4.979773 |
| C | 1.602498  | -0.305025 | -4.542236 |
| C | -1.997449 | 0.052834  | -3.950404 |
| C | -2.618245 | -0.995302 | -3.008494 |
| C | -2.481733 | -0.219638 | -5.382675 |
| C | -2.415881 | 1.477952  | -3.543464 |
| C | 2.797590  | 0.114360  | -2.305098 |
| C | 4.059281  | -0.130612 | -3.149454 |
| C | 2.764883  | -0.938297 | -1.178932 |
| H | 0.470387  | 0.512035  | -0.878257 |
| H | -0.035194 | -0.515601 | -5.969956 |
| H | 2.505671  | -0.476235 | -5.095043 |
| H | -2.281312 | -0.833143 | -1.986152 |
| H | -2.330716 | -2.004042 | -3.318643 |
| H | -3.709277 | -0.924087 | -3.042987 |
| H | -2.085662 | 0.507989  | -6.095802 |
| H | -3.570655 | -0.139303 | -5.400605 |
| H | -2.219454 | -1.225924 | -5.720167 |
| H | -2.000191 | 2.210568  | -4.241420 |
| H | -2.060203 | 1.706974  | -2.539882 |
| H | -3.506046 | 1.564965  | -3.566111 |
| H | 4.155447  | 0.591189  | -3.964215 |
| H | 4.081873  | -1.140727 | -3.565716 |
| H | 4.933463  | -0.019921 | -2.504796 |
| H | 1.935990  | -0.805519 | -0.483779 |
| H | 3.690123  | -0.879570 | -0.598829 |
| H | 2.944833  | 2.271333  | -2.559587 |
| H | 3.759771  | 1.652942  | -1.112147 |
| H | 2.002314  | 1.808382  | -1.141145 |
| N | 0.240765  | -0.408930 | 1.589992  |
| N | 0.511025  | 0.058127  | 3.900442  |
| N | -1.591686 | 0.023805  | 3.170938  |
| C | -0.262410 | -0.137039 | 2.751910  |
| C | -0.331191 | 0.324492  | 4.979773  |
| C | -1.602498 | 0.305025  | 4.542236  |
| C | 1.997449  | -0.052834 | 3.950404  |
| C | 2.618245  | 0.995302  | 3.008494  |
| C | 2.481733  | 0.219638  | 5.382675  |
| C | 2.415881  | -1.477952 | 3.543464  |
| C | -2.797590 | -0.114360 | 2.305098  |
| C | -4.059281 | 0.130612  | 3.149454  |
| C | -2.764883 | 0.938297  | 1.178932  |
| C | -2.872784 | -1.548430 | 1.742650  |
| H | -0.470387 | -0.512035 | 0.878257  |
| H | 0.035194  | 0.515601  | 5.969956  |
| H | -2.505671 | 0.476235  | 5.095043  |
| H | 2.281312  | 0.833143  | 1.986152  |
| H | 2.330716  | 2.004042  | 3.318643  |
| H | 3.709277  | 0.924087  | 3.042987  |
| H | 2.085662  | -0.507989 | 6.095802  |
| H | 3.570655  | 0.139303  | 5.400605  |
| H | 2.219454  | 1.225924  | 5.720167  |
| H | 2.000191  | -2.210568 | 4.241420  |
| H | 2.060203  | -1.706974 | 2.539882  |
| H | 3.506046  | -1.564965 | 3.566111  |

Supplementary Material (ESI) for Organic and Biomolecular Chemistry  
This journal is (C) The Royal Society of Chemistry 2006

|   |           |           |          |
|---|-----------|-----------|----------|
| H | -4.155447 | -0.591189 | 3.964215 |
| H | -4.081873 | 1.140727  | 3.565716 |
| H | -4.933463 | 0.019921  | 2.504796 |
| H | -1.935990 | 0.805519  | 0.483779 |
| H | -3.690123 | 0.879570  | 0.598829 |
| H | -2.695243 | 1.941899  | 1.606861 |
| H | -2.944833 | -2.271333 | 2.559587 |
| H | -3.759771 | -1.652942 | 1.112147 |
| H | -2.002314 | -1.808382 | 1.141145 |

**Structure of 5 (atom, x-, y-, z-positions in Å):**

|   |           |           |           |
|---|-----------|-----------|-----------|
| H | -2.671886 | 0.788728  | 0.964581  |
| H | 2.771556  | 0.489146  | 1.066747  |
| C | 2.464977  | 0.301349  | 0.032107  |
| C | 0.688547  | -1.517311 | 0.000275  |
| C | -0.660500 | -1.530740 | 0.005453  |
| H | 2.525901  | 1.240122  | -0.517955 |
| C | -2.463673 | 0.260553  | 0.027380  |
| N | 1.104161  | -0.188917 | -0.039055 |
| N | -1.095796 | -0.202035 | -0.024658 |
| N | 0.083936  | 1.943231  | -0.005994 |
| C | 0.002606  | 0.655879  | -0.024025 |
| H | -3.131705 | -0.597490 | -0.043682 |
| H | -2.678160 | 0.934067  | -0.808237 |
| H | 3.137425  | -0.431647 | -0.416440 |
| H | 1.390345  | -2.333233 | 0.000736  |
| H | -1.350510 | -2.356591 | 0.007678  |
| H | -0.830830 | 2.382565  | -0.012616 |

**Structure of 5-H (atom, x-, y-, z-positions in Å):**

|   |           |           |           |
|---|-----------|-----------|-----------|
| H | -2.697268 | 0.817041  | 0.898841  |
| H | 3.136961  | -0.616145 | -0.040537 |
| C | 2.478672  | 0.248826  | -0.007659 |
| C | 0.674181  | -1.560431 | 0.003113  |
| C | -0.674251 | -1.560434 | 0.003176  |
| H | 2.697029  | 0.817343  | 0.898692  |
| C | -2.478694 | 0.248966  | -0.007721 |
| N | 1.093292  | -0.227208 | 0.005815  |
| N | -1.093337 | -0.227170 | 0.005928  |
| N | 0.000117  | 1.907544  | -0.036826 |
| C | -0.000009 | 0.559330  | 0.007829  |
| H | -3.137057 | -0.615959 | -0.040932 |
| H | -2.661198 | 0.860387  | -0.893430 |
| H | 2.661407  | 0.859967  | -0.893533 |
| H | 1.379662  | -2.372745 | 0.003117  |
| H | -1.379819 | -2.372670 | 0.003142  |
| H | -0.854737 | 2.416666  | 0.123867  |
| H | 0.855122  | 2.416410  | 0.123931  |

**Structure of 6 (atom, x-, y-, z-positions in Å):**

|   |           |           |           |
|---|-----------|-----------|-----------|
| H | -2.647916 | 0.419668  | 1.123046  |
| H | 3.154107  | -0.210322 | 0.595349  |
| C | 2.447191  | 0.372930  | -0.000126 |
| C | 0.766238  | -1.496087 | -0.123304 |
| C | -0.745890 | -1.503467 | 0.107121  |
| H | 2.485221  | 1.415206  | 0.311507  |
| C | -2.443692 | 0.333086  | 0.044874  |
| N | 1.103061  | -0.122232 | 0.215845  |
| N | -1.099860 | -0.128096 | -0.233452 |
| N | 0.086522  | 1.981848  | -0.000066 |
| C | 0.006009  | 0.703367  | -0.006593 |
| H | -3.160403 | -0.366152 | -0.390940 |
| H | -2.611868 | 1.306055  | -0.419741 |
| H | 2.742384  | 0.313462  | -1.058537 |
| H | 1.296719  | -2.207016 | 0.514538  |
| H | -0.980866 | -1.729256 | 1.159187  |
| H | 1.006237  | -1.723078 | -1.174636 |
| H | -1.272209 | -2.218237 | -0.529632 |
| H | -0.818606 | 2.420045  | -0.138261 |

**Structure of 6-H (atom, x-, y-, z-positions in Å):**

|   |           |           |           |
|---|-----------|-----------|-----------|
| H | -2.697268 | 0.817041  | 0.898841  |
| H | 3.136961  | -0.616145 | -0.040537 |
| C | 2.478672  | 0.248826  | -0.007659 |
| C | 0.674181  | -1.560431 | 0.003113  |
| C | -0.674251 | -1.560434 | 0.003176  |
| H | 2.697029  | 0.817343  | 0.898692  |
| C | -2.478694 | 0.248966  | -0.007721 |
| N | 1.093292  | -0.227208 | 0.005815  |
| N | -1.093337 | -0.227170 | 0.005928  |
| N | 0.000117  | 1.907544  | -0.036826 |
| C | -0.000009 | 0.559330  | 0.007829  |
| H | -3.137057 | -0.615959 | -0.040932 |
| H | -2.661198 | 0.860387  | -0.893430 |
| H | 2.661407  | 0.859967  | -0.893533 |
| H | 1.379662  | -2.372745 | 0.003117  |
| H | -1.379819 | -2.372670 | 0.003142  |
| H | -0.854737 | 2.416666  | 0.123867  |
| H | 0.855122  | 2.416410  | 0.123931  |

**Structure of 7 (atom, x-, y-, z-positions in Å):**

|   |           |           |           |
|---|-----------|-----------|-----------|
| H | -2.316391 | 0.997152  | 1.215914  |
| H | 2.719650  | 0.990192  | 0.851225  |
| C | 2.429705  | 0.538196  | -0.107048 |
| H | 2.320236  | 1.340579  | -0.833509 |
| C | -2.418695 | 0.439041  | 0.284328  |
| N | 1.183396  | -0.212207 | -0.008856 |
| N | -1.167960 | -0.225298 | -0.041945 |
| N | 0.076440  | 1.816388  | 0.202196  |
| C | 0.009702  | 0.541291  | 0.055867  |
| H | -3.193338 | -0.318733 | 0.423689  |
| H | -2.761751 | 1.128163  | -0.504854 |
| H | 3.220169  | -0.144090 | -0.430945 |
| H | -0.828350 | 2.258056  | 0.065584  |
| C | -1.289987 | -1.176250 | -1.147753 |
| H | -0.316283 | -1.590980 | -1.396372 |
| H | -1.961605 | -1.992133 | -0.865039 |
| H | -1.696945 | -0.692978 | -2.049224 |
| C | 1.297967  | -1.416519 | 0.812127  |
| H | 0.330879  | -1.902270 | 0.916365  |
| H | 1.997673  | -2.116287 | 0.346386  |
| H | 1.672103  | -1.177392 | 1.819140  |

**Structure of 7-H (atom, x-, y-, z-positions in Å):**

|   |           |           |           |
|---|-----------|-----------|-----------|
| H | -2.321034 | 1.223824  | 0.970231  |
| H | 3.139033  | -0.268854 | -0.540771 |
| C | 2.447567  | 0.493023  | -0.180031 |
| H | 2.887753  | 0.963563  | 0.705449  |
| C | -2.449151 | 0.484835  | 0.180821  |
| N | 1.166923  | -0.157743 | 0.132146  |
| N | -1.166412 | -0.161303 | -0.132363 |
| N | -0.002958 | 1.842096  | 0.001446  |
| C | -0.000802 | 0.494456  | 0.000416  |
| H | -3.138218 | -0.279870 | 0.540161  |
| H | -2.890760 | 0.955512  | -0.703878 |
| H | 2.317010  | 1.232984  | -0.968128 |
| H | -0.772873 | 2.364644  | -0.384643 |
| H | 0.765097  | 2.366510  | 0.388712  |
| C | -1.267831 | -1.453279 | -0.830158 |
| H | -0.322318 | -1.705416 | -1.303087 |
| H | -1.560334 | -2.251627 | -0.144824 |
| H | -2.028257 | -1.364859 | -1.609103 |
| C | 1.272519  | -1.450531 | 0.827814  |
| H | 0.327830  | -1.706492 | 1.300339  |
| H | 1.567582  | -2.246809 | 0.141172  |
| H | 2.032674  | -1.360936 | 1.606889  |

## 2. NRT (Natural Resonance Theory) Analysis

### Most important resonance structures of compound 5.

| weight-% | resonance structures                                                                 |
|----------|--------------------------------------------------------------------------------------|
| 48.97    | 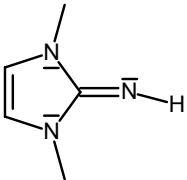   |
| 12.27    |    |
| 8.96     |  |
| 8.34     |  |
| 4.35     |  |

**Most important resonance structures of compound 6.**

| weight-% | resonance structures                                                                 |
|----------|--------------------------------------------------------------------------------------|
| 62.01    | 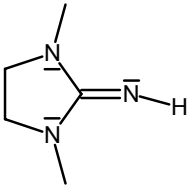   |
| 9.11     |    |
| 7.56     |   |
| 2.87     |  |
| 1.47     |  |
| 1.24     |  |



**Most important resonance structures of compound 7.**

| weight-% | resonance structures |
|----------|----------------------|
| 64.90    |                      |
| 7.36     |                      |
| 6.74     |                      |
| 2.27     |                      |
| 1.41     |                      |
| 1.33     |                      |
